# Supplementary material for: Plume Layer Influences the Amazon Reef Sponge Microbiome Primary Producers
Source: Frontiers journal article supplement (doi:10.3389/fmars.2022.867234), 2022-05-19
Supplement: Data_Sheet_1.xlsx [file Data_Sheet_1.xlsx]

## Sheet: Caribbean_samples
BioSample	Run	Platform	Strategy	Source	Selection	Layout	Instrument	Primers	Amplified Region	Organism	Host	Geographic location	Latitude	Longitude	Collection date	Reference
SAMN08987402	SRR7068155	Illumina	Amplicon	Metagenomic	PCR	Paired	Illumina HiSeq 2500	515F/806R	V4 Region (16S rRNA)	Marine Metagenome	Agelas sventres	Curacao	12.084667 N	68.898083 W	2015-11	[1]	[1] Indraningrat AAG, Micheller S, Runderkamp M, Sauerland I, Becking LE, Smidt H, et al. Cultivation of
SAMN08987404	SRR7068157	Illumina	Amplicon	Metagenomic	PCR	Paired	Illumina HiSeq 2500	515F/806R	V4 Region (16S rRNA)	Marine Metagenome	Agelas sventres	Curacao	12.084667 N	68.898083 W	2015-11	[1]	Sponge-Associated Bacteria from Agelas sventres and Xestospongia muta Collected from Different Depths.
SAMN08987406	SRR7068159	Illumina	Amplicon	Metagenomic	PCR	Paired	Illumina HiSeq 2500	515F/806R	V4 Region (16S rRNA)	Marine Metagenome	Agelas sventres	Curacao	12.084667 N	68.898083 W	2015-11	[1]	Marine Drugs. 2019 October;17(10). Available from: https://dx.doi.org/10.3390
SAMN08987397	SRR7068173	Illumina	Amplicon	Metagenomic	PCR	Paired	Illumina HiSeq 2500	515F/806R	V4 Region (16S rRNA)	Marine Metagenome	Agelas sventres	Curacao	12.084667 N	68.898083 W	2015-11	[1]
SAMN08987398	SRR7068176	Illumina	Amplicon	Metagenomic	PCR	Paired	Illumina HiSeq 2500	515F/806R	V4 Region (16S rRNA)	Marine Metagenome	Agelas sventres	Curacao	12.084667 N	68.898083 W	2015-11	[1]
SAMN08987401	SRR7068181	Illumina	Amplicon	Metagenomic	PCR	Paired	Illumina HiSeq 2500	515F/806R	V4 Region (16S rRNA)	Marine Metagenome	Agelas sventres	Curacao	12.084667 N	68.898083 W	2015-11	[1]
SAMN12290107	SRS9041395	Illumina	Amplicon	Metagenomic	PCR	Paired	Illumina MiniSeq	515F/806R	V4 Region (16S rRNA)	Sponge Metagenome	Geodia sp.	Belize: Carrie Bow Cay	16.800083 N	88.077800 W	2017-05-26	NA
SAMN12290108	SRS9041405	Illumina	Amplicon	Metagenomic	PCR	Paired	Illumina MiniSeq	515F/806R	V4 Region (16S rRNA)	Sponge Metagenome	Geodia sp.	Belize: Carrie Bow Cay	16.800083 N	88.077800 W	2017-05-26	NA
SAMN12290109	SRS9041416	Illumina	Amplicon	Metagenomic	PCR	Paired	Illumina MiniSeq	515F/806R	V4 Region (16S rRNA)	Sponge Metagenome	Geodia sp.	Belize: Carrie Bow Cay	16.800083 N	88.077800 W	2017-05-26	NA
SAMN12290110	SRS9041427	Illumina	Amplicon	Metagenomic	PCR	Paired	Illumina MiniSeq	515F/806R	V4 Region (16S rRNA)	Sponge Metagenome	Geodia sp.	Belize: Carrie Bow Cay	16.800083 N	88.077800 W	2017-05-26	NA
SAMN12290538	SRS9041573	Illumina	Amplicon	Metagenomic	PCR	Paired	Illumina MiniSeq	515F/806R	V4 Region (16S rRNA)	Sponge Metagenome	Geodia sp.	Cayman Islands: Grand Cayman	19.361967 N	81.402300 W	2018-01-23	NA
SAMN12290539	SRS9041575	Illumina	Amplicon	Metagenomic	PCR	Paired	Illumina MiniSeq	515F/806R	V4 Region (16S rRNA)	Sponge Metagenome	Geodia sp.	Cayman Islands: Grand Cayman	19.361967 N	81.402300 W	2018-01-23	NA
